## RESEARCH ARTICLE

# Acceptability and feasibility of digital adherence technologies for drug-susceptible tuberculosis treatment supervision: A meta-analysis of implementation feedback

Kevin Guzman<sup>1</sup>, Rebecca Crowder<sup>1</sup>, Anna Leddy<sup>1</sup>, Noriah Maraba<sup>2</sup>, Lauren Jennings<sup>3</sup>, Shahriar Ahmed<sup>4</sup>, Sonia Sultana<sup>4</sup>, Baraka Onjare<sup>5</sup>, Lucas Shilugu<sup>5</sup>, Jason Alacapa<sup>5</sup>, Jens Levy<sup>5</sup>, Achilles Katamba<sup>6</sup>, Alex Kityamuwesi<sup>6</sup>, Aleksey Bogdanov<sup>7</sup>, Kateryna Gamazina<sup>7</sup>, Adithya Cattamanchi<sup>1†\*</sup>, Amera Khan<sup>8†\*</sup>

**1** University of California, San Francisco, United States of America, **2** The Aurum Institute, Johannesburg, South Africa, **3** Desmond Tutu Health Foundation, Cape Town, South Africa, **4** icddr,b, Dhaka, Bangladesh, **5** KNCV, The Hague, The Netherlands, **6** Makerere University, Kampala, Uganda, **7** PATH, Kiev, Ukraine, **8** Stop TB Partnership/TB REACH, Geneva, Switzerland

† These authors are senior co-authors on this work.

\* [Adithya.Cattamanchi@ucsf.edu](mailto:Adithya.Cattamanchi@ucsf.edu) (AC); [amerak@stoptb.org](mailto:amerak@stoptb.org) (AK)

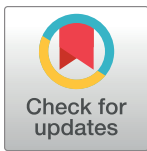

## OPEN ACCESS

**Citation:** Guzman K, Crowder R, Leddy A, Maraba N, Jennings L, Ahmed S, et al. (2023) Acceptability and feasibility of digital adherence technologies for drug-susceptible tuberculosis treatment supervision: A meta-analysis of implementation feedback. *PLOS Digit Health* 2(8): e0000322. <https://doi.org/10.1371/journal.pdig.0000322>

**Editor:** Laura M. König, University of Bayreuth: Universitat Bayreuth, GERMANY

**Received:** November 16, 2022

**Accepted:** July 10, 2023

**Published:** August 15, 2023

**Copyright:** © 2023 Guzman et al. This is an open access article distributed under the terms of the [Creative Commons Attribution License](https://creativecommons.org/licenses/by/4.0/), which permits unrestricted use, distribution, and reproduction in any medium, provided the original author and source are credited.

**Data Availability Statement:** Because some of the qualitative data may be identifiable, this data can be made available upon reasonable request to TB REACH at [TBREACH@stoptb.org](mailto:TBREACH@stoptb.org).

**Funding:** This research was supported by the Stop TB Partnership's TB REACH initiative with funding from the Bill and Melinda Gates Foundation (BMGF), grant number OPP1139029 and from the Global Affairs Canada (GAC), grant number CA-3-D000920001. The funders of the study had no role

## Abstract

Digital adherence technologies (DATs) have emerged as an alternative to directly observed therapy (DOT) for supervisions of tuberculosis (TB) treatment. We conducted a meta-analysis of implementation feedback obtained from people with TB and health care workers (HCWs) involved in TB REACH Wave 6-funded DAT evaluation projects. Projects administered standardized post-implementation surveys based on the Capability, Opportunity, Motivation, Behavior (COM-B) model to people with TB and their health care workers. The surveys included questions on demographics and technology use, Likert scale questions to assess capability, opportunity, and motivation to use DAT and open-ended feedback. We summarized demographic and technology use data descriptively, generated pooled estimates of responses to Likert scale questions within each COM-B category for people with TB and health care workers using random effects models, and performed qualitative analysis of open-ended feedback using a modified framework analysis approach. The analysis included surveys administered to 1290 people with TB and 90 HCWs across 6 TB REACH-funded projects. People with TB and HCWs had an overall positive impression of DATs with pooled estimates between 4.0 to 4.8 out of 5 across COM-B categories. However, 44% of people with TB reported taking TB medications without reporting dosing via DATs and 23% reported missing a dose of medication. Common reasons included problems with electricity, network coverage, and technical issues with the DAT platform. DATs were overall perceived to reduce visits to clinics, decrease cost, increase social support, and decrease workload of HCWs. DATs were acceptable in a wide variety of settings. However, there were challenges related to the feasibility of using current DAT platforms. Implementation efforts should concentrate on ensuring access, anticipating, and addressing technical challenges, and minimizing additional cost to people with TB.

in the study design, data collection, data analysis, data interpretation, or writing of the report.

**Competing interests:** The authors have declared that no competing interests exist.

## Author summary

Digital adherence technologies (DATs) are increasingly being implemented as an alternative to traditional directly observed therapy (DOT) for TB treatment. However, to date there are limited data on their feasibility and acceptability among both persons on treatment and health care workers, resulting in only a conditional recommendation for their use in TB treatment by the World Health Organization in their 2017 *Guidelines for treatment of drug-susceptible tuberculosis and patient care*. Our study provides information on the feasibility and acceptability of implementing and using different DATs in a variety of settings and target populations for TB treatment adherence. The use of a similar survey across multiple sites helps provide a common understanding of facilitators and barriers on the use of DATs as global and national TB programs consider the expansion of the use of these tools. Our evidence demonstrates a high acceptability of DATs and supports further implementation of DATs as a component of TB treatment support. However, implementation efforts need to address issues concerning access to these tools, the technical challenges that are associated with the platforms, while minimizing additional burdens and costs to people with TB.

## Introduction

Despite the availability of effective treatment, tuberculosis (TB) remains a leading cause of death from an infectious agent [1]. Successful treatment of drug-susceptible TB (DS-TB) requires high levels of adherence to treatment lasting at least 4 months. Since the 1990s, directly observed therapy (DOT) has been employed globally to monitor and support adherence to TB medications. However, there is limited evidence that DOT improves treatment completion in comparison to self-administered therapy [2,3], and treatment completion rates remain below the 90% target in most high burden countries [1]. DOT is associated with catastrophic costs and rigid enforcement of DOT may conflict with the autonomy, dignity, and integrity of people with TB [4,5].

There has been increasing interest in digital adherence technologies (DATs) as a more person-centered alternative to DOT. DATs enable people with TB to take TB medicines at a time and place of their choosing and allow health care workers (HCWs) to monitor adherence and provide tailored adherence support to those who need it [6]. Several different commercial DAT platforms have been deployed in high TB burden countries. These include 99DOTS, a phone-based technology by which people self-report adherence via calls or texts to phone numbers that are revealed behind pills in a medication sleeve [7]; electronic smart pillboxes made of either plastic or cardboard, such as evriMED, which passively register dosing events when the pillbox is opened [8]; and video directly observed therapy (VDOT), whereby people record and upload videos documenting medication ingestion using a smartphone or computer with a camera [9]. Although these technologies are increasingly being implemented, there are limited data on their effectiveness, acceptability, and feasibility, resulting in only a conditional recommendation for their use in TB treatment by the World Health Organization (WHO) [10].

To assess the acceptability and feasibility of DATs from a variety of settings and target populations, the Stop TB Partnership's TB REACH initiative funded 14 DAT projects in 12 countries as part of their Wave 6 funding portfolio [11]. We analyzed standardized implementation feedback obtained from people with TB and HCWs as part of the TB REACH-funded projects.

## Methods

### Studies and participants

We excluded TB REACH Wave 6-funded DAT evaluation projects that did not use a commercial DAT platform, share individual participant data with the Stop TB Partnership or exclusively enrolled people with drug-resistant TB (DR-TB). In addition, we excluded people with TB from the analysis if they were younger than 15 years old or were missing data on sex and excluded HCWs from the analysis if they did not provide direct care to people on TB treatment.

### Survey design

Standardized post-implementation surveys for people with TB and HCWs were designed by the TB REACH DAT working group to assess the feasibility and acceptability of using a DAT as part of TB treatment. Feasibility was defined as the extent to which DAT could be successfully used or carried out within a given setting [12]. Acceptability was defined as the perception that the DAT was agreeable, palatable, or satisfactory [13]. To assess feasibility and acceptability, the survey included questions about access to technology and experience using DATs and Likert scale questions, developed to reflect selected domains of the Theoretical Domains Framework. (TDF) [14]. The TDF integrates 33 psychologic theories relevant to behavior change into 14 domains related to Capability (knowledge, attention, memory, and decision processes necessary to use DAT), Opportunity (social and environmental context conducive to using DAT), or Motivation (optimism, reinforcement, and emotion to want to use DAT) to perform a Behavior (COM-B) [15,16]. Health worker surveys also included constructs from the Unified Theory of Acceptance and Use of Technology (UTAUT), a consolidated framework to explain information systems usage behavior [17–19]. In addition, the surveys included open-ended questions to further explore DAT feasibility and acceptability, as well as recommendations for improvement (S1 and S2 Tables).

Projects administered surveys to a random sample of people with TB and HCWs. In some cases, projects modified the survey tools to exclude certain questions or include additional questions. Survey administration varied by project and surveys were conducted either by HCWs or research staff. Questionnaires were translated into the local language as needed. This analysis included only survey questions that were used in common by all projects.

### Data analysis

Responses from people with TB and HCWs were analyzed separately and stratified by DAT platform evaluated. Demographics and data on access to and use of technology were summarized descriptively. Responses to Likert scale questions were summarized by project using means and standard deviations. A response of agree or strongly agree reflected a favorable impression of DAT. If the question was asked such that agreement indicated an unfavorable impression of DAT, responses were reversed prior to analysis. Composite scores for capability, opportunity, and motivation were created for each person with TB and HCW by calculating the mean response to Likert scale questions within that category.

Pooled estimates for capability, opportunity, and motivation scores across projects were generated using random effects, sample size weighted models. A sample size weighted model was chosen over an inverse variance weighted model due to lack of variance in survey responses across participants for some projects. Secondary analyses assessed differences by gender and age category ( $\geq 55$  years old vs.  $< 55$  years old). Differences in mean capability, opportunity, and motivation scores were calculated by gender and by age category for each

project. Pooled estimates of the gender and age category differences in mean scores were then generated using the random effects, sample size weighted model described above. Stata 15 was used for all quantitative analyses.

Qualitative analysis of responses to open ended survey questions was performed using a modified framework analysis approach [20]. We began by sorting responses into frames reflecting the open-ended questions posed in each survey. Content that was common across participants (mentioned by four or more participants) or that was uncommon but offered unique insights was flagged for inclusion as a theme. Themes that emerged across frames were considered cross-cutting themes. The main themes across the data sources were then consolidated and synthesized into chart format and organized as barriers/facilitators to DAT uptake by COM-B category, DAT type, project country and sex. This enabled us to identify similarities and differences in barriers and facilitators to DAT uptake across DAT type, country, and sex.

## Results

### Setting and study population

Of the 14 TB REACH Wave 6-funded DAT evaluation projects, 8 were excluded (2 exclusively enrolled people with drug-resistant TB, 2 used a locally-developed rather than commercial DAT platform, and 4 did not share individual data from persons on TB treatment or HCWs). The remaining six projects administered surveys to 1,316 people with TB and 92 HCWs using 99DOTS or evriMED for TB treatment supervision. Survey data from 1290 (98.0%) people with TB and 90 (97.8%) HCWs were analyzed (Fig 1).

Details of study setting and DAT implementation for the six included projects are provided in S3 Table. Projects in Uganda, South Africa, Tanzania, and Ukraine were conducted at government-run TB treatment facilities, whereas projects in Bangladesh and the Philippines implemented DATs in private sector settings. Most HCWs treated only people with drug susceptible TB, but HCWs surveyed in Ukraine were treating both people with drug susceptible and drug resistant TB.

Projects implementing 99DOTS provided medication blister packs placed within an envelope that revealed toll-free numbers when medications were pushed out of the blister pack.

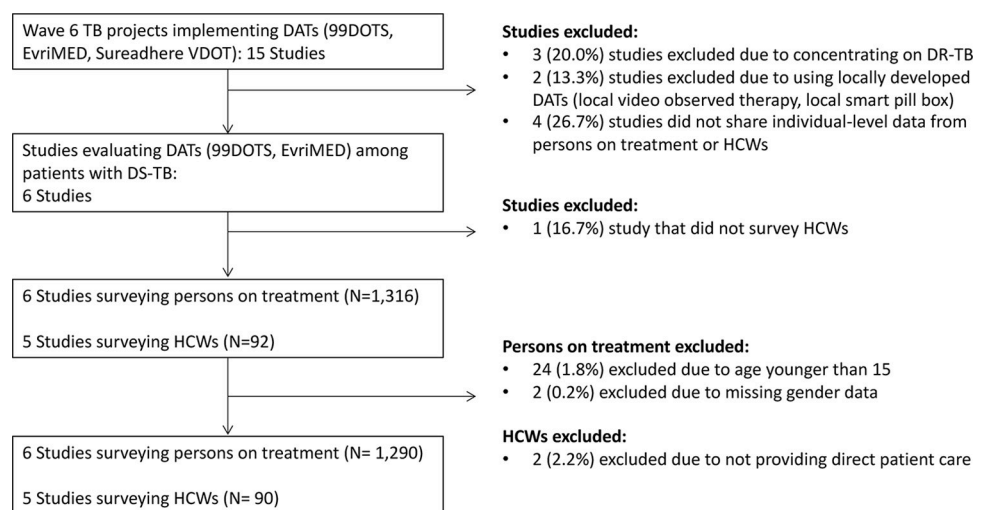

**Fig 1. Studies and population included in meta-analysis.** TB: tuberculosis; DAT: digital adherence technology; VDOT: video directly observed therapy; HCW: health care worker.

<https://doi.org/10.1371/journal.pdig.0000322.g001>

Table 1. Demographic characteristics and access to technologies among persons on TB treatment.

|                           |                       | Total<br>n (%)<br>(n = 1,290) | 99DOTS<br>n (%) (n = 1,017) | EvriMED<br>N (%)<br>(n = 273) |
|---------------------------|-----------------------|-------------------------------|-----------------------------|-------------------------------|
| COUNTRY                   | Bangladesh            | 599 (46.4)                    | 599 (58.9)                  | n/a                           |
|                           | Tanzania              | 200 (15.5)                    | 200 (19.7)                  | n/a                           |
|                           | Uganda                | 112 (8.7)                     | 112 (11.0)                  | n/a                           |
|                           | Philippines           | 106 (8.2)                     | 106 (10.4)                  | n/a                           |
|                           | Ukraine               | 122 (9.5)                     | n/a                         | 122 (44.7)                    |
|                           | South Africa          | 151 (11.7)                    | n/a                         | 151 (55.3)                    |
| MALE                      |                       | 791 (61.3)                    | 634 (62.3)                  | 157 (57.5)                    |
| AGE                       | 15 to 44              | 884 (68.5)                    | 706 (69.4)                  | 178 (65.2)                    |
|                           | 45 to 54              | 189 (14.7)                    | 138 (13.6)                  | 51 (18.7)                     |
|                           | 55 or older           | 217 (16.8)                    | 173 (17.0)                  | 44 (16.1)                     |
| OCCUPATION <sup>a,b</sup> | Self-Employed         | 344 (30.2)                    | 331 (32.6)                  | 12 (10.7)                     |
|                           | Hired worker          | 375 (32.9)                    | 324 (31.9)                  | 51 (41.8)                     |
|                           | Student               | 143 (12.6)                    | 143 (14.1)                  | 0 (0)                         |
|                           | Unemployed            | 139 (12.2)                    | 81 (8.0)                    | 58 (47.5)                     |
|                           |                       |                               |                             |                               |
| EDUCATION <sup>c</sup>    | No schooling          | 115 (8.9)                     | 112 (11.0)                  | 3 (1.1)                       |
|                           | Primary School        | 442 (34.3)                    | 422 (41.6)                  | 20 (7.3)                      |
|                           | Secondary School      | 470 (36.5)                    | 247 (24.3)                  | 223 (81.7)                    |
|                           | Post-Secondary School | 261 (20.3)                    | 234 (23.1)                  | 27 (9.9)                      |
| PHONE ACCESS              | Personal phone        | 1,072 (83.1)                  | 829 (81.5)                  | 243 (89.0)                    |
|                           | Shared, Primary Owner | 117 (9.1)                     | 104 (10.2)                  | 13 (4.8)                      |
|                           | Shared, Not Owner     | 90 (7.0)                      | 79 (7.8)                    | 11 (4.0)                      |
|                           | No access             | 11 (0.9)                      | 5 (0.5)                     | 6 (2.2)                       |
| PHONE CREDIT <sup>d</sup> | Always                | 267 (20.9)                    | 161 (15.9)                  | 106 (39.7)                    |
| FREQUENCY <sup>e</sup>    | Sometimes             | 835 (65.3)                    | 694 (68.6)                  | 141 (52.8)                    |
|                           | Never                 | 172 (13.5)                    | 156 (15.4)                  | 16 (6.0)                      |

<sup>a</sup> Data missing for all people with TB in South Africa (n = 151)

<sup>b</sup> 138 people with TB using 99DOTS had other occupations

<sup>c</sup> Education status missing for one person in Uganda and 1 person in Tanzania

<sup>d</sup> Phone credit refers to the availability of airtime minutes on the phone.

<sup>e</sup> Among people with TB that reported having access to a phone (n = 1,279). Phone credit frequency missing for 2 people in South Africa, 2 people in Ukraine, and 1 person in Uganda

<https://doi.org/10.1371/journal.pdig.0000322.t001>

People with TB were instructed to call or text the toll-free numbers daily to confirm dosing. In Tanzania, although people with TB were not charged for text messages to the 99DOTS platform, they were required to have a daily minimum airtime balance on their phones to place calls or texts. Thus, during study recruitment, those who disclosed not regularly keeping a minimum airtime balance on their phones were excluded from the project as they would not be able to text the 99DOTS platform to confirm dosing. Projects implementing evriMED provided a smart pill box that contained TB medication blister packs. In all projects, HCWs could access and monitor daily adherence data using a mobile phone or web-based application.

In total, 1,017 people with TB using 99DOTS in 4 countries and 273 using evriMED in 2 countries completed surveys from September 2019 to May 2020 (Table 1). Almost half were from Bangladesh (n = 599, 46.4%). Sample sizes for the other five projects ranged from 106 to 200 people with TB. Responses to open-ended survey questions were provided by 306 people

Table 2. Demographic characteristics of health care workers.

|                           |                       | Total<br>N(%)<br>(n = 90) | 99DOTS<br>N(%)<br>(n = 70) | EvriMED<br>N(%)<br>(n = 20) |
|---------------------------|-----------------------|---------------------------|----------------------------|-----------------------------|
| COUNTRY                   | Bangladesh            | 14 (15.6)                 | 14 (20.0)                  | n/a                         |
|                           | Philippines           | 12 (13.3)                 | 12 (17.1)                  | n/a                         |
|                           | Uganda                | 23 (25.6)                 | 23 (32.9)                  | n/a                         |
|                           | Tanzania              | 21 (23.3)                 | 21 (30.0)                  | n/a                         |
|                           | Ukraine               | 20 (22.2)                 | n/a                        | 20 (100)                    |
| MALE                      |                       | 36 (40.0)                 | 33 (47.1)                  | 3 (15.0)                    |
| AGE                       | 18 to 44              | 61 (67.8)                 | 51 (74.3)                  | 10 (50.0)                   |
|                           | 45 to 54              | 17 (18.9)                 | 13 (18.6)                  | 4 (20.0)                    |
|                           | 55 or older           | 12 (13.3)                 | 6 (8.6)                    | 6 (30.0)                    |
| OCCUPATION                | Doctor                | 16 (17.8)                 | 3 (4.3)                    | 13 (65.0)                   |
|                           | Nurse                 | 37 (41.1)                 | 32 (45.7)                  | 5 (25.0)                    |
|                           | Community HCW         | 23 (25.6)                 | 23 (32.9)                  | 0 (0.0)                     |
|                           | Clinical officer      | 7 (7.8)                   | 7 (10.0)                   | 0 (0.0)                     |
|                           | Clinic support        | 7 (7.8)                   | 5 (7.1)                    | 2 (10.0)                    |
| EDUCATION <sup>a</sup>    | Secondary school      | 23 (26.7)                 | 19 (28.8)                  | 4 (20.0)                    |
|                           | Post-secondary school | 63 (73.3)                 | 47 (71.2)                  | 16 (80.0)                   |
| HAD A SMARTPHONE          |                       | 87 (96.7)                 | 68 (97.1)                  | 19 (95.0)                   |
| PHONE CREDIT <sup>b</sup> | Always                | 63 (82.9)                 | 45 (80.4)                  | 17 (90.0)                   |
| FREQUENCY <sup>c</sup>    | Sometimes             | 13 (17.1)                 | 11 (19.6)                  | 2 (10.0)                    |
|                           | Never                 | 0 (0.0)                   | 0 (0.0)                    | 0 (0.0)                     |

<sup>a</sup> Data missing for 4 HCWs in Tanzania

<sup>b</sup> Phone credit refers to the availability of airtime minutes on the phone.

<sup>c</sup> Data missing for all HCWs in Bangladesh (n = 14)

<https://doi.org/10.1371/journal.pdig.0000322.t002>

with TB in Tanzania and the Philippines using 99DOTS, and 19 in Ukraine using evriMED (S4–S6 Tables).

Five projects conducted HCW surveys. In total, 33 HCWs using 99DOTS in 4 countries and 20 HCWs using evriMED in Ukraine completed surveys (Table 2). Sample sizes per project ranged from 12 to 23 HCWs. Responses to open-ended survey questions were provided by 33 HCWs in Tanzania and the Philippines using 99DOTS, and 20 HCWs in Ukraine using evriMED (S5 Table).

## Demographics and access to technology

Across all projects, 61.3% (n = 791) of people with TB were male, and 68.5% (n = 884) were younger than 45 years old (Table 1). Most were self-employed (n = 344, 30.2%) or hired for work (n = 375, 32.9%). A higher proportion of people using evriMED were unemployed compared to 99DOTS (47.5% v. 8.0%), likely reflecting differences in the settings where projects were conducted. Most had completed secondary school education (n = 731, 56.5%) with a higher proportion of evriMED users completing secondary school (91.6% v. 47.4%). Almost all people with TB (n = 1,072, 83.8%) had access to their own phone or were the primary owner of a shared phone. Of those with access to a phone, most only sometimes had access to phone credit (airtime minutes) (n = 835, 65.3%), and 13.5% (n = 172) reported never having access to phone credit.

Most HCWs surveyed were nurses ( $n = 37$ , 41.1%) or community health workers ( $n = 23$ , 25.6%), reflecting the primary staff involved in follow-up of people receiving TB treatment (Table 2). Of 90 HCWs surveyed, 54 (60%) were female and 61 (67.8%) were younger than 45 years old. All HCWs had completed at least secondary school with the majority ( $n = 63$ , 73.3%) completing post-secondary school. Almost all ( $n = 87$ , 96.7%) had access to a smartphone and always had phone credit ( $n = 63$ , 82.9%). Some ( $n = 13$ , 17.3%) reported only sometimes having phone credit and no one reported not having phone credit (S7 Table).

### Experience using DATs

Overall, 44.1% ( $n = 233$ ) of people with TB reported having taken their medication but not reporting it using DAT at least once during treatment (Table 3). This was similar among those using 99DOTS and evriMED (42.8% v. 46.0%). The most common reason for not reporting taken doses were problems with charging the battery of their device, poor network connection, forgetting to use the DAT, and the DAT not working. Only 2 (0.9%) responded that they did not want to use the DAT. About one-fifth ( $n = 132$ , 22.9%) of people with TB reported missing a dose of medication. Common reasons included forgetting to take their medication, medication side effect, and being too busy. They usually took less than 2 minutes to take their medication and made 1 to 5 visits a month to a TB clinic. Most ( $n = 335$ , 78.3%) lived within an hour of their clinic, however 93 (21.7%) had to travel more than an hour.

All HCWs received data from the DAT and most reviewed data daily ( $n = 73$ , 90.1%) through phone messages, mobile phone applications, and/or computers (S8 Table). Adherence was most frequently assessed using the mobile phone application ( $n = 77$ , 85.6%). In addition, HCWs reported calling people with TB ( $n = 56$ , 62.2%), asking when they refilled medications ( $n = 51$ , 56.7%), and talking to their family members ( $n = 44$ , 48.9%). Throughout the project, 52.2% ( $n = 47$ ) of HCWs were not able to assess adherence data at some point. HCWs cited problems with poor network connection ( $n = 38$ , 80.9) and the mobile phone application not working ( $n = 34$ , 72.3%). Some also experienced electricity outages or limited access to records. No HCW responded that they did not want to use the DAT.

### Capability to use DAT

Overall, people with TB had a favorable impression of their capability to use DAT (Fig 2). Mean responses for both 99DOTS (4.49, 95% CI 3.95–5.03) and evriMED (4.58, 95% CI 3.86–5.31) were near 4.5, reflecting a response between agree and strongly agree. There were no differences in mean capability scores by DAT type, sex or age (S1 and S2 Figs).

Capability was facilitated by knowledge that the DAT was a tool to help people with TB remember to take their medication and improve their adherence (Table 4). They reported that DATs reminded them to take their medications and facilitated adherence monitoring and support.

*“The fact that with the smartbox it’s impossible to forget to take medicines. It help me to become healthier.”*- Female 45–54, Ukraine evriMED

Some in the Philippines (mostly men) described forgetting to call/text the platform and confusion about the purpose of 99DOTS:

*“With 99DOTS, sometimes I just really forget to text. I’d sometimes tell myself I’d do it later, but I keep forgetting”*- Male, 30–35, Philippines 99DOTS

Table 3. Experience using DAT among people on TB treatment.

|                                                           |                            | <b>Total<br/>N(%)<br/>(n = 691)</b> | <b>99DOTS<br/>N(%)<br/>(n = 418)</b> | <b>EvriMED<br/>N(%)<br/>(n = 273)</b> |
|-----------------------------------------------------------|----------------------------|-------------------------------------|--------------------------------------|---------------------------------------|
| <b>DID NOT REPORT TAKING MEDICATION<sup>a</sup></b>       |                            | 233 (44.1)                          | 131 (42.8)                           | 102 (46.0)                            |
| <b>REASONS WHY</b>                                        | Unable to charge battery   | 62 (26.6)                           | 33 (25.2)                            | 29 (28.4)                             |
|                                                           | Poor network connection    | 39 (16.7)                           | 19 (14.5)                            | 20 (19.6)                             |
|                                                           | DAT was not working        | 29 (12.5)                           | 10 (7.6)                             | 19 (18.6)                             |
|                                                           | Did not want to use DAT    | 2 (0.9)                             | 0 (0)                                | 2 (2.0)                               |
|                                                           | Forgot to use DAT          | 36 (15.4)                           | 31 (23.7)                            | 5 (4.9)                               |
| <b>MISSED A DOSE OF MEDICATION<sup>b</sup></b>            |                            | 132 (22.9)                          | 21 (6.9)                             | 111 (41.1)                            |
| <b>REASONS WHY</b>                                        | Forgot to take             | 22 (16.7)                           | 3 (14.3)                             | 19 (17.1)                             |
|                                                           | Was too busy               | 18 (13.6)                           | 2 (9.5)                              | 16 (14.4)                             |
|                                                           | Side effects               | 14 (10.6)                           | 2 (9.5)                              | 12 (10.8)                             |
|                                                           | Did not want to use DAT    | 3 (2.3)                             | 0 (0)                                | 3 (2.7)                               |
|                                                           | Did not want anyone to see | 3 (2.3)                             | 1 (4.8)                              | 2 (1.8)                               |
| <b>TIME TO TAKE MEDICATION<sup>c</sup></b>                |                            |                                     |                                      |                                       |
|                                                           | Less Than 1 minute         | 327 (47.5)                          | 239 (57.2)                           | 88 (32.6)                             |
|                                                           | 1 to 2 minutes             | 213 (31.0)                          | 125 (29.9)                           | 88 (32.6)                             |
|                                                           | More than 3 minutes        | 148 (21.5)                          | 54 (12.9)                            | 94 (34.8)                             |
| <b>PAID EXTRA TO USE DAT<sup>d</sup></b>                  |                            | 37 (8.7)                            | 33 (10.8)                            | 4 (3.3)                               |
|                                                           | Phone credit               | 37 (100)                            | 33 (100)                             | 4 (100)                               |
| <b>FREQUENCY VISITING TB CLINIC PER MONTH<sup>e</sup></b> |                            |                                     |                                      |                                       |
|                                                           | 1 to 5                     | 395 (96.8)                          | 298 (97.7)                           | 97 (94.2)                             |
|                                                           | 6 to 15                    | 12 (2.9)                            | 6 (2.0)                              | 6 (5.8)                               |
|                                                           | More than 15               | 1 (0.3)                             | 1 (0.3)                              | 0 (0)                                 |
| <b>TRAVEL TIME TO TB CLINIC<sup>f</sup></b>               |                            |                                     |                                      |                                       |
|                                                           | 0 to 30 minutes            | 254 (59.4)                          | 196 (64.1)                           | 58 (47.5)                             |
|                                                           | 31 to 59 minutes           | 81 (18.9)                           | 50 (16.3)                            | 31 (25.4)                             |
|                                                           | More than 1 hour           | 93 (21.7)                           | 50 (19.6)                            | 33 (27.1)                             |

Note. People with TB in Bangladesh not included in this table (data not available)

<sup>a</sup> Data missing for all people with TB in Uganda (n = 112), 51 in South Africa

<sup>b</sup> Data missing for all people with TB in Uganda (n = 112), 3 from other sites

<sup>c</sup> Data missing for 1 people with TB in Ukraine, 2 in South Africa

<sup>d</sup> Data missing for all people with TB in South Africa (n = 151) and Uganda (n = 112), 1 in Ukraine

<sup>e</sup> Data missing for all people with TB in South Africa (n = 151) and Uganda (n = 112), 1 in Philippines, 19 in Ukraine

<sup>f</sup> Data missing for all people with TB in South Africa (n = 151) and Uganda (n = 112)

<https://doi.org/10.1371/journal.pdig.0000322.t003>

Overall, HCWs also had a favorable impression of their capability to use DAT (Fig 3). HCWs in Tanzania had exclusively strongly agree responses in the capability domain. Pooled estimates for HCWs using 99DOTS (4.89, 95% CI 4.79–4.98) and evriMED (4.78, 95% CI 4.65–4.90) were both high. HCWs felt that the training they received was relevant, useful, and clear, facilitating their capability to successfully implement DATs. HCWs suggested refresher training on any updates to the device/platform would further improve their capability.

### Opportunity to use DAT

Within opportunity, people with TB largely thought that using DAT was acceptable and 1,243 (96.4%) would recommend it to their family members. 1,090 (84.5%) agreed or strongly agreed



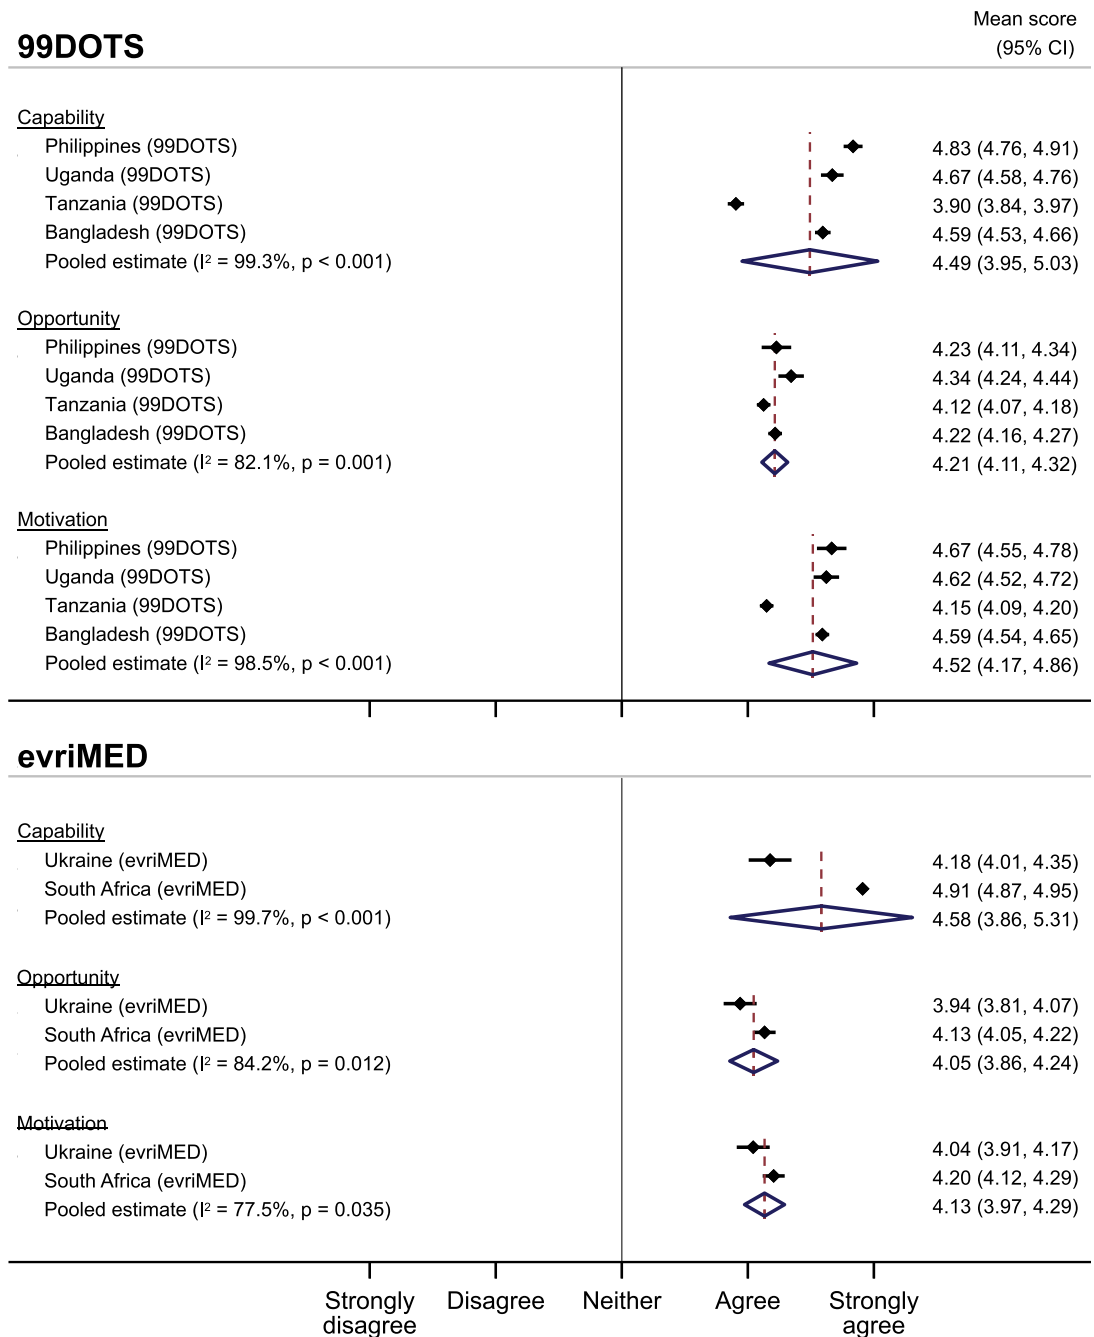

**Fig 2. Mean Capability, Opportunity, and Motivation scores by DAT and country among people with TB.**

<https://doi.org/10.1371/journal.pdig.0000322.g002>

that DAT helped them feel more connected their HCW, and 1,106 (85.7%) strongly disagreed or disagreed that it took too much time to take TB medicine with DAT. But there were some concerns related to using DAT in front of others as it could result in the disclosure of TB status (Fig 2). Pooled estimates for 99DOTS (4.21, 95% CI 4.11–4.32) and evriMED (4.05, 95% CI 3.86–4.24) were less favorable than for capability, but overall still positive with responses averaging above “agree”. There were no differences by gender or age (S3 and S4 Figs).

Table 4. Summary of qualitative analysis of responses from people with TB and health care workers by COM-B Category.

|                                  |                     | Capability                                                                                         | Opportunity                                                                                                                                                                                                                                                                                                                                                                                                                | Motivation                                                                                                                                                                                                                                                                                                               |
|----------------------------------|---------------------|----------------------------------------------------------------------------------------------------|----------------------------------------------------------------------------------------------------------------------------------------------------------------------------------------------------------------------------------------------------------------------------------------------------------------------------------------------------------------------------------------------------------------------------|--------------------------------------------------------------------------------------------------------------------------------------------------------------------------------------------------------------------------------------------------------------------------------------------------------------------------|
| <b>FINDINGS ACROSS ALL SITES</b> |                     |                                                                                                    |                                                                                                                                                                                                                                                                                                                                                                                                                            |                                                                                                                                                                                                                                                                                                                          |
| Facilitators                     | People with TB      | Knowledge that DATs are designed to improve TB medication adherence.                               | DATs saved time and money that would have otherwise been spent traveling to the clinic.                                                                                                                                                                                                                                                                                                                                    | DATs facilitate adherence monitoring and support<br>DAT reminders to take TB medicines improved adherence                                                                                                                                                                                                                |
|                                  | Health Care Workers | Training perceived as adequate, relevant, and clear.                                               | Greatly reduced workload, enabling HCWs to spend more quality time with people that needed extra support.                                                                                                                                                                                                                                                                                                                  | DATs facilitated easy adherence monitoring and follow-up/adherence support.<br>Convenience (could monitor adherence at a convenient time and place).<br>Perceived that DATs improved people with TB adherence and TB outcomes<br>DATs improved relationship between HCWs and people with TB (e.g. trust & communication) |
| Barriers                         | People with TB      |                                                                                                    | Challenges with charging phones and evriMED box noted by some men.                                                                                                                                                                                                                                                                                                                                                         |                                                                                                                                                                                                                                                                                                                          |
| <b>SITE SPECIFIC FINDINGS</b>    |                     |                                                                                                    |                                                                                                                                                                                                                                                                                                                                                                                                                            |                                                                                                                                                                                                                                                                                                                          |
| Barriers                         | People with TB      | <b>Philippines:</b><br>Confusion about purpose of 99DOTS.<br>Forgetting to call/text the platform. | <b>Tanzania:</b> Lack of access to a phone and phone credit<br><b>Philippines:</b><br>Technical issues with the platform (e.g. does not register text messages sent by people with TB)<br>Phone/internet service interruptions                                                                                                                                                                                             | <b>Ukraine:</b> Dislike material (cardboard) and large size of evriMed box                                                                                                                                                                                                                                               |
|                                  | Health Care Workers |                                                                                                    | <b>Tanzania:</b> People with TB lack phone credit to call 99DOTS<br><b>Ukraine evriMed and Philippines 99DOTS:</b> technical issues with DATs<br><b>Ukraine:</b> Box does not close tightly/register when open & close it to take medications; battery does not charge<br><b>Philippines:</b> 99DOTS platform does not register text messages from people with TB confirming doses taken; platform down 2–3 times a month. |                                                                                                                                                                                                                                                                                                                          |

TB: tuberculosis; HCW: health care worker

<https://doi.org/10.1371/journal.pdig.0000322.t004>

People with TB across all studies reported that DATs saved time and money that they would have otherwise spent traveling to clinic each day to take their TB medication under DOT (Table 4):

*“With the smartbox I can stay at home. It saves my time and money.”* - Male, 65–74, Ukraine evriMED

Those using 99DOTS also liked that calling or texting 99DOTS was free and noted greater social support:

*“I get treated for TB for free and I have to text 99DOTS everyday. My eldest reminds me too and asks me if I’ve already taken my medicine for the day.”* - Female, 45–54, Philippines 99DOTS

In Tanzania, although patients were not charged for messaging the 99DOTS platform, nearly half of participants indicated lack of access to a phone and phone credit (which was required to send free text messages) as major barriers to using 99DOTS. People using both

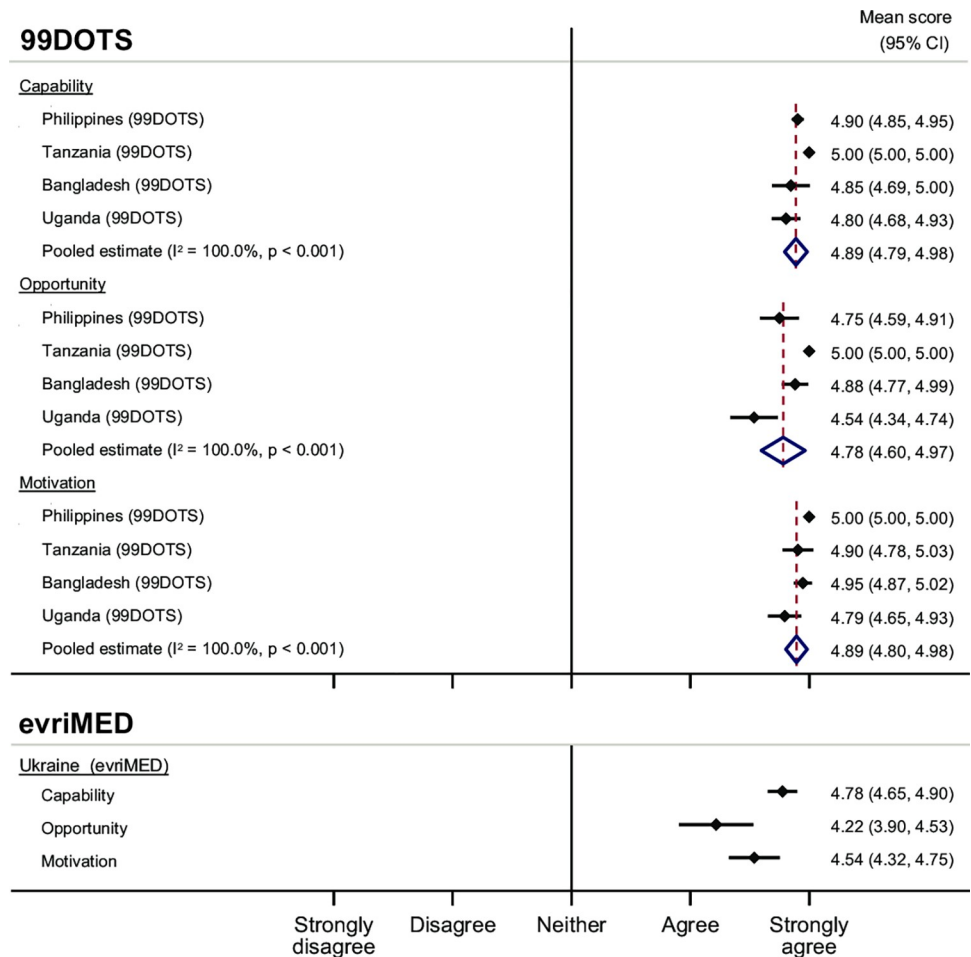

**Fig 3. Mean Capability, Opportunity, and Motivation scores by DAT and country among health care workers.**

<https://doi.org/10.1371/journal.pdig.0000322.g003>

99DOTS and evriMED reported issues with charging their phones or boxes. Those using evriMED disliked the design of the box, pointing to the cardboard material and large size.

Responses by HCW also showed favorable opportunity to use DATs (Fig 3). HCWs using 99DOTS in Tanzania exclusively had “strongly agree” responses to questions in the opportunity domain. Pooled estimates were high for both 99DOTS (4.22, 95% CI 3.90–4.53) and evriMED (4.78, 95% CI 4.60–4.97).

HCWs endorsed decreased workloads and thought that DATs were more person-centered, relieving some of the financial impact of TB treatment and allowing people with TB to go on long trips and continue working. Several HCWs noted that DATs enabled them to spend more quality time engaging with people with TB who needed their support or to attend to other administrative tasks. Barriers included difficulty calling people with TB if they did not have phone credit and lack of access to phones in Tanzania. Additionally, there were technical issues with the evriMED box not closing tightly or not registering when they took their medication and 99DOTS not registering all text messages from them. A small group of HCWs (primarily from Ukraine) perceived DATs increased their workload by adding more forms and procedures for them to complete each day.

## Motivation to use DAT

People with TB were motivated to complete treatment and get healthy, but there were concerns about data privacy (Table 4). Motivation was favorable for using both 99DOTS (pooled estimate 4.52, 95% CI 4.17–4.86) and evriMED (pooled estimate 4.52, 95% CI 4.17–4.86) (Fig 2). There were no differences in pooled estimates of motivation to use 99DOTS by gender or age, but among people with TB using evriMED, mean motivation scores were higher among older adults ( $\geq 55$  vs.  $< 55$  years old). (S5 to S6 Figs).

HCWs also demonstrated high motivation to use DAT, having almost exclusively “strongly agree” responses for both 99DOTS (pooled estimate 4.89, 95% CI 4.80–4.98) and evriMED (pooled estimate 4.54, 95% CI 4.32–4.75) (Fig 3). Across projects, HCWs described liking that DATs facilitated easy adherence monitoring and follow-up/adherence support, and believed that DATs improved adherence for people with TB.

## Discussion

Overall, we found that 99DOTS and evriMED were both highly acceptable to people receiving treatment for DS-TB and HCWs caring for them. However, there were barriers encountered that decreased the feasibility of DATs, some of which can be targets for future optimization of these technologies and their implementation. Gender did not have an impact on the perceived acceptability or feasibility of the two DAT platforms; however, motivation to use the evriMED was higher among older adults ( $> 55$  years). While it is often thought that digital health tools may be less acceptable to older adults, our finding is similar to other research suggesting that higher age is associated with higher perceived usefulness of digital health tools [21].

Our findings largely support prior studies demonstrating DATs offer an acceptable, person-centered approach to TB care [22–24]. Although, projects included in our analyses varied in terms of network infrastructure, access to mobile phones, target population and settings (public v private clinics), overall, high acceptability was demonstrated by high capability, opportunity, and motivation to use 99DOTS and evriMED among people with TB and HCWs in all projects. Both agreed that DATs saved time and money which would have otherwise been spent traveling to clinics. Our study also found that people with TB using DAT felt strongly connected to their HCWs. Most HCWs endorsed reduced workload when using DAT. Thomas et al reported similar findings among HCWs at government-run TB centers in India [25]. Stigma related to taking TB medication contributed to lower opportunity scores, reflecting the known impact of stigma on TB care [26].

In addition to stigma, barriers to the feasibility of implementing DATs included limited access to mobile phones, network connectivity, and technical issues with phones and the two DAT platforms. The projects evaluating 99DOTS required that participants have access to mobile phones, and specifically in the case of Tanzania, a minimum airtime balance, to participate in the projects. The data reported here therefore do not reflect the perspectives of all people with TB. Moreover, these issues highlight the need to ensure access to DATs in an equitable manner. Although daily access to cell phones among people with TB included in the projects was high, 44% reported having taken their TB medication but not reporting it using their DAT. Issues with charging phones/boxes and network connectivity were barriers to using DATs across all projects. In Tanzania, the only 99DOTS project where a toll-free number still required phone credit, nearly half of people with TB completing open-ended questions mentioned the cost associated with needing phone credit as a key barrier. A minority reported other issues with their DAT, such as the evriMED box not closing tightly and the 99DOTS platform not registering texts or calls that were sent from people with TB. Similar technical barriers have been reported previously in China, India, Peru, and sub-Saharan Africa [25,27–30].

Our analysis had some limitations. First, each project was unique in its study design, target population, and implementation methods, therefore the survey sampling and administration skills varied across projects making it difficult to ascertain all potential causes of selection bias for the studies included in this meta-analysis. For example, most projects administered their surveys pre-COVID-19, but both Bangladesh and South Africa administered their surveys post-COVID-19 protection measures, potentially resulting in more favorable responses when there was an increased awareness of the important role that digital health tools can offer compared to in-person care. Some projects required participants to have regular access to a phone and phone airtime credit, which may have prevented more socially or economically disadvantaged people with TB from participating in the intervention and survey. More than half of the people with TB responding to the 99DOTS survey came from Bangladesh, so their responses are overrepresented in pooled estimates; however mean capability, opportunity, and motivation scores from Bangladesh fell near the median of other project responses, indicating that this was unlikely to have a large impact on the results. Similarly, for evriMED, only HCWs from Ukraine completed the survey. Therefore, we are unable to pool results from multiple projects and these responses may not reflect the experience in other geographic areas. Second, since the surveys were implemented by the project teams, participating people with TB and HCWs may have felt pressure to please the person administering the survey. Social desirability bias may result in more favorable responses. Third, selection of DAT was not randomized, which prevented direct comparison of acceptability and feasibility of the two DAT platforms; differences observed may reflect differences in setting or project implementation. Finally, qualitative data was only collected via open-ended survey questions and not through in-depth interviews. This may have prevented us from gaining a deeper and more nuanced understanding of the barriers and facilitators to DAT implementation and acceptability. There are other commonly used DATs not represented in these data. Similar findings for those using video observed therapy, another DAT, were noted in other studies [31].

In summary, the available data show high acceptability of DATs and support further scale-up of DAT for treatment of DS-TB. DATs can be an acceptable, person-centered care option for many people with TB. They have the potential to address some of the structural challenges (access to care, time, distance, and costs) many people with TB face. However, for many underserved TB populations, these solutions may still be out of reach with the existing digital divide in many countries, particularly among rural and poorer populations. Without access, digital health solutions can potentially compound health inequities and further marginalize these populations. Thus, implementation efforts should focus not only on anticipating and addressing technical challenges with the platforms and minimizing additional costs to people with TB; the focus should also be on ensuring access and digital health equity.

## Supporting information

**S1 Table. Constructs assessed in survey administered to people with TB by COM-B category.**

(DOCX)

**S2 Table. Constructs assessed in survey administered to health care workers, by COM-B category.**

(DOCX)

**S3 Table. Characteristics of studies included in the meta-analysis.**

(DOCX)

**S4 Table. TB REACH Wave 6 digital adherence technology projects included.**  
(DOCX)

**S5 Table. People with TB and health care workers included in qualitative analyses.**  
(DOCX)

**S6 Table. Demographic characteristics of people with TB included in qualitative analysis.**  
(DOCX)

**S7 Table. Demographic characteristics of health care workers included in qualitative analysis.**  
(DOCX)

**S8 Table. Experience using digital adherence technologies among health care workers.**  
(DOCX)

**S9 Table. Internal consistency of survey responses among people with TB.**  
(DOCX)

**S10 Table. Internal consistency of survey responses among health care workers.**  
(DOCX)

**S1 Fig. Difference in mean Capability scores by gender among people with TB.**  
(EPS)

**S2 Fig. Difference in mean Capability scores by age ( $\geq 55$  vs.  $< 55$  years) among people with TB.**  
(EPS)

**S3 Fig. Difference in mean Opportunity scores by gender among people with TB.**  
(EPS)

**S4 Fig. Difference in mean Opportunity scores by age ( $\geq 55$  vs.  $< 55$  years) among people with TB.**  
(EPS)

**S5 Fig. Difference in mean Motivation scores by gender among people with TB.**  
(EPS)

**S6 Fig. Difference in mean Motivation scores by age ( $\geq 55$  vs.  $< 55$  years) among people with TB.**  
(EPS)

**S1 Dataset. People with TB data.**  
(XLSX)

**S2 Dataset. Health care worker data.**  
(XLSX)

## Acknowledgments

We are grateful to all the people with TB and the health care workers who participated in the survey. We also would like to acknowledge Miranda Brouwer, Danielle Cazabon, Kristian Van Kalmthout, Tripti Pande, Oriol Ramis, and Bruce Thomas for helping conceptualize this work or having input into the data collection tools.

## Author Contributions

**Conceptualization:** Aleksey Bogdanov, Adithya Cattamanchi, Amera Khan.

**Data curation:** Kevin Guzman, Rebecca Crowder, Anna Leddy.

**Formal analysis:** Kevin Guzman, Rebecca Crowder, Anna Leddy.

**Funding acquisition:** Amera Khan.

**Investigation:** Kevin Guzman, Noriah Maraba, Lauren Jennings, Shahriar Ahmed, Sonia Sultana, Baraka Onjare, Lucas Shilugu, Jason Alacapa, Jens Levy, Achilles Katamba, Alex Kityamuwesi, Aleksey Bogdanov, Kateryna Gamazina, Amera Khan.

**Methodology:** Rebecca Crowder, Adithya Cattamanchi, Amera Khan.

**Project administration:** Amera Khan.

**Resources:** Amera Khan.

**Supervision:** Adithya Cattamanchi, Amera Khan.

**Validation:** Kevin Guzman, Rebecca Crowder, Adithya Cattamanchi, Amera Khan.

**Visualization:** Kevin Guzman.

**Writing – original draft:** Kevin Guzman, Rebecca Crowder, Adithya Cattamanchi.

**Writing – review & editing:** Kevin Guzman, Rebecca Crowder, Anna Leddy, Noriah Maraba, Lauren Jennings, Shahriar Ahmed, Sonia Sultana, Baraka Onjare, Lucas Shilugu, Jason Alacapa, Jens Levy, Achilles Katamba, Alex Kityamuwesi, Aleksey Bogdanov, Kateryna Gamazina, Adithya Cattamanchi, Amera Khan.

## References

1. World Health Organization. Global Tuberculosis Report 2021. World Health Organization. 2021.
2. Pasipanodya JG, Gumbo T. A meta-analysis of self-administered vs directly observed therapy effect on microbiologic failure, relapse, and acquired drug resistance in tuberculosis patients. *Clin Infect Dis*. 2013; 57(1):21–31. <https://doi.org/10.1093/cid/cit167> PMID: 23487389
3. Karumbi J, Garner P. Directly observed therapy for treating tuberculosis. *Cochrane Database Syst Rev*. 2015; 2015(5):Cd003343. <https://doi.org/10.1002/14651858.CD003343.pub4> PMID: 26022367; PubMed Central PMCID: PMC4460720.
4. Tanimura T, Jaramillo E, Weil D, Raviglione M, Lonroth K. Financial burden for tuberculosis patients in low- and middle-income countries: a systematic review. *Eur Respir J*. 2014; 43(6):1763–75. <https://doi.org/10.1183/09031936.00193413> PMID: 24525439; PubMed Central PMCID: PMC4040181.
5. Sagbakken M, Frich JC, Bjune GA, Porter JD. Ethical aspects of directly observed treatment for tuberculosis: a cross-cultural comparison. *BMC Med Ethics*. 2013; 14(1):1–10. <https://doi.org/10.1186/1472-6939-14-25> PMID: 23819555
6. Subbaraman R, de Mondesert L, Musiimenta A, Pai M, Mayer KH, Thomas BE, et al. Digital adherence technologies for the management of tuberculosis therapy: mapping the landscape and research priorities. *BMJ Glob Health*. 2018; 3(5):e001018. <https://doi.org/10.1136/bmjgh-2018-001018> PMID: 30364330; PubMed Central PMCID: PMC6195152.
7. Everwell Health Solutions. 99DOTS, low-cost monitoring and improving medication adherence. 2020. Available from: <https://www.99dots.org>.
8. Wisepill Technologies. Evrimed Smart Pillbox. 2022. Available from: <https://www.wisepill.com/evrimed>.
9. SureAdhere Mobile Technology I. SureAdhere Video Directly Observed Therapy (VDOT). 2022. Available from: <http://www.sureadhere.com/>.
10. World Health Organization. Guidelines for treatment of drug-susceptible tuberculosis and patient care. 2017.
11. Stop TB Partnership. Wave 6. 2022. Available from: <https://www.stoptb.org/global/awards/tbreach/wave6.asp/>.

12. Proctor E, Silmere H, Raghavan R, Hovmand P, Aarons G, Bungler A, et al. Outcomes for implementation research: conceptual distinctions, measurement challenges, and research agenda. *Adm Policy Ment Health*. 2011; 38(2):65–76. <https://doi.org/10.1007/s10488-010-0319-7> PMID: 20957426
13. Peters DH, Adam T, Alonge O, Agyepong IA, Tran N. Implementation research: what it is and how to do it. *BMJ*. 2013; 347:f6753. <https://doi.org/10.1136/bmj.f6753> PMID: 24259324
14. French SD, Green SE, O'Connor DA, McKenzie JE, Francis JJ, Michie S, et al. Developing theory-informed behaviour change interventions to implement evidence into practice: a systematic approach using the Theoretical Domains Framework. *Implement Sci*. 2012; 7:38. <https://doi.org/10.1186/1748-5908-7-38> PMID: 22531013; PubMed Central PMCID: PMC3443064.
15. Atkins L, Francis J, Islam R, O'Connor D, Patey A, Ivers N, et al. A guide to using the Theoretical Domains Framework of behaviour change to investigate implementation problems. *Implement Sci*. 2017; 12(1):77. <https://doi.org/10.1186/s13012-017-0605-9> PMID: 28637486; PubMed Central PMCID: PMC5480145.
16. Michie S, van Stralen MM, West R. The behaviour change wheel: a new method for characterising and designing behaviour change interventions. *Implement Sci*. 2011; 6:42. <https://doi.org/10.1186/1748-5908-6-42> PMID: 21513547; PubMed Central PMCID: PMC3096582.
17. Venkatesh V, Morris MG, Davis GB, Davis FD. User acceptance of information technology: Toward a unified view. *MIS quarterly*. 2003:425–78.
18. Venkatesh V, Thong JY, Xu X. Consumer acceptance and use of information technology: extending the unified theory of acceptance and use of technology. *MIS quarterly*. 2012:157–78.
19. Sarfaraz J. Unified theory of acceptance and use of technology (Utaut) model-mobile banking. *Journal of Internet Banking and Commerce*. 2017; 22(3):1–20.
20. Pope C, Ziebland S, Mays N. Qualitative research in health care. Analysing qualitative data. *BMJ*. 2000; 320(7227):114–6. <https://doi.org/10.1136/bmj.320.7227.114> PMID: 10625273; PubMed Central PMCID: PMC1117368.
21. Jokisch M, Schmidt L, Doh M. Acceptance of digital health services among older adults: Findings on perceived usefulness, self-efficacy, privacy concerns, ICT knowledge, and support seeking. *Front Public Health*. 2022; 10. <https://doi.org/10.3389/fpubh.2022.1073756> PMID: 36582385
22. Kumar AA, De Costa A, Das A, Srinivasa G, D'Souza G, Rodrigues R. Mobile health for tuberculosis management in South India: is video-based directly observed treatment an acceptable alternative? *JMIR Mhealth Uhealth*. 2019; 7(4):e11687. <https://doi.org/10.2196/11687> PMID: 30942696
23. Gashu KD, Gelaye KA, Tilahun B. Feasibility, acceptability and challenges of phone reminder system implementation for tuberculosis pill refilling and medication in Northwest Ethiopia. 2021.
24. Siedner MJ, Haberer JE, Bwana MB, Ware NC, Bangsberg DR. High acceptability for cell phone text messages to improve communication of laboratory results with HIV-infected patients in rural Uganda: a cross-sectional survey study. *BMC Med Inform Decis Mak*. 2012; 12(1):1–7. <https://doi.org/10.1186/1472-6947-12-56> PMID: 22720901
25. Thomas BE, Kumar JV, Onongaya C, Bhatt SN, Galivanche A, Periyasamy M, et al. Explaining Differences in the acceptability of 99DOTS, a cell phone-based strategy for monitoring adherence to Tuberculosis medications: qualitative study of patients and health care providers. *JMIR Mhealth Uhealth*. 2020; 8(7):e16634. <https://doi.org/10.2196/16634> PMID: 32735220; PubMed Central PMCID: PMC428900
26. Courtwright A, Turner AN. Tuberculosis and stigmatization: pathways and interventions. *Public Health Rep*. 2010; 125 Suppl 4:34–42. <https://doi.org/10.1177/00333549101250S407> PMID: 20626191
27. Liu X, Lewis JJ, Zhang H, Lu W, Zhang S, Zheng G, et al. Effectiveness of electronic reminders to improve medication adherence in tuberculosis patients: a cluster-randomised trial. *PLoS Med*. 2015; 12(9):e1001876. <https://doi.org/10.1371/journal.pmed.1001876> PMID: 26372470
28. Saunders MJ, Wingfield T, Tovar MA, Herlihy N, Rocha C, Zevallos K, et al. Mobile phone interventions for tuberculosis should ensure access to mobile phones to enhance equity—a prospective, observational cohort study in Peruvian shantytowns. *Trop Med Int Health*. 2018; 23(8):850–9. <https://doi.org/10.1111/tmi.13087> PMID: 29862612
29. Siedner MJ, Lankowski A, Musinga D, Jackson J, Muzoora C, Hunt PW, et al. Optimizing network connectivity for mobile health technologies in sub-Saharan Africa. *PLoS Med*. 2012; 9(9):e1001259. <https://doi.org/10.1371/journal.pone.0045643> PMID: 23029155
30. Hermans SM, Elbireer S, Tibakabikoba H, Hoefman BJ, Manabe YC. Text messaging to decrease tuberculosis treatment attrition in TB-HIV coinfection in Uganda. *Patient Prefer Adherence*. 2017; 11:1479–87. <https://doi.org/10.2147/PPA.S135540> PMID: 28919720
31. Sekandi JN, Kasiita V, Onuoha NA, Zalwango S, Nakkonde D, Kaawa-Mafigiri D, et al. Stakeholders' perceptions of benefits of and barriers to using video-observed treatment for monitoring patients with tuberculosis in Uganda: exploratory qualitative study. *JMIR Mhealth Uhealth*. 2021; 9(10):e27131. <https://doi.org/10.2196/27131> PMID: 34704961
